# Supplementary material
Source: Springer Nature journal article supplement (https://www.springermedizin.de/resource/supplementary/12931_2010_1038_MOESM5_ESM.pdf/9425426)

**a****Total BAL Leukocytes**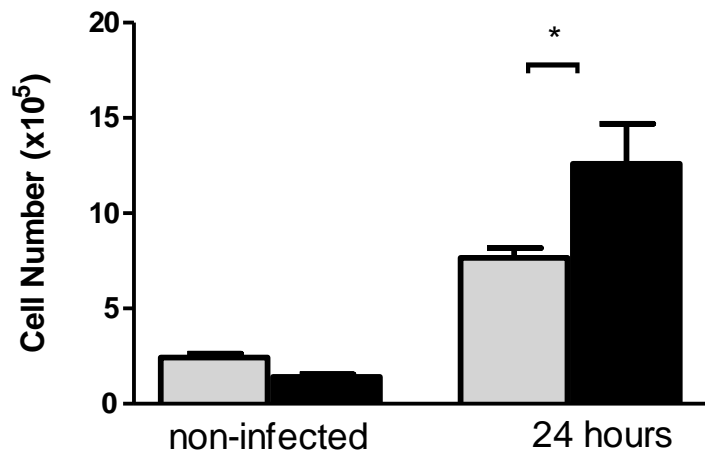**b****wild type (24H)**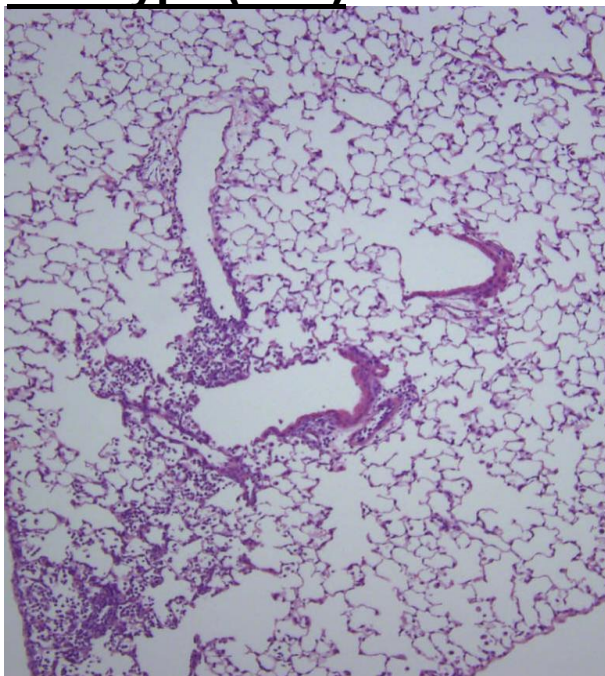**C****SPC-sICAM-1 (24H)**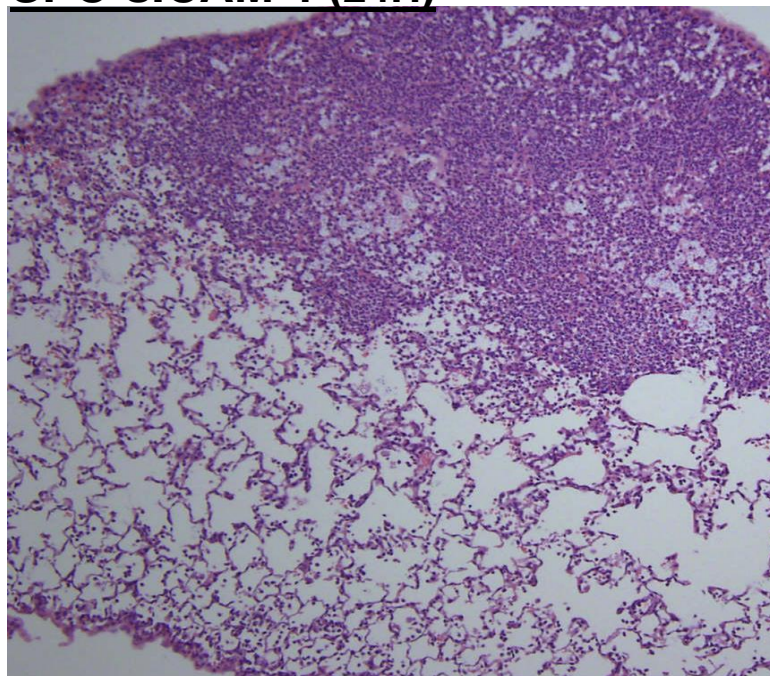

Supplement: MOESM5 [file 9425426]
